# Supplementary material for: Regulation of the valleytronic properties in single-layer NbSeCl
Source: Royal Society of Chemistry journal article supplement (doi:10.1039/d4cp03706e), 2024-12-13
Supplement: d4cp03706e1.pdf [file d4cp03706e1.pdf]

## Regulation of the Valleytronic Properties in Single-Layer NbSeCl

<sup>1</sup>Xiaole Qiu, <sup>2</sup>Benchao Gong, <sup>1</sup>Wenjun Zhang, <sup>1</sup>Bing Liu, <sup>1</sup>Kai Han, <sup>1</sup>Hongchao Yang\*

<sup>1</sup>School of Physics and Electronic Information, Weifang University, Weifang 261061, China

<sup>2</sup>Department of Physics, School of Science, Jiangsu University of Science and Technology,  
Zhenjiang 212100, China

\*Corresponding author: hc\_yang90@163.com

**Table SI** The calculated relative energies (meV) of the NbSeCl/HfN<sub>2</sub> heterostructures (b), (c), (d), (e), (f) and (g) with respect to that of the configuration (a).

| configuration | (a) | (b) | (c)  | (d) | (e)  | (f) |
|---------------|-----|-----|------|-----|------|-----|
| $\Delta E$    | 0   | 3.2 | 45.6 | 7.7 | 43.5 | 4.0 |

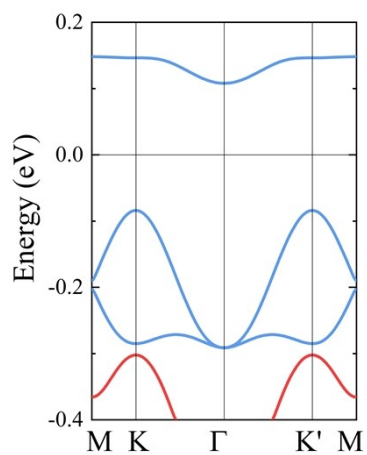

Fig. S1 The band structures of Cr-doped NbSeCl without SOC effect.

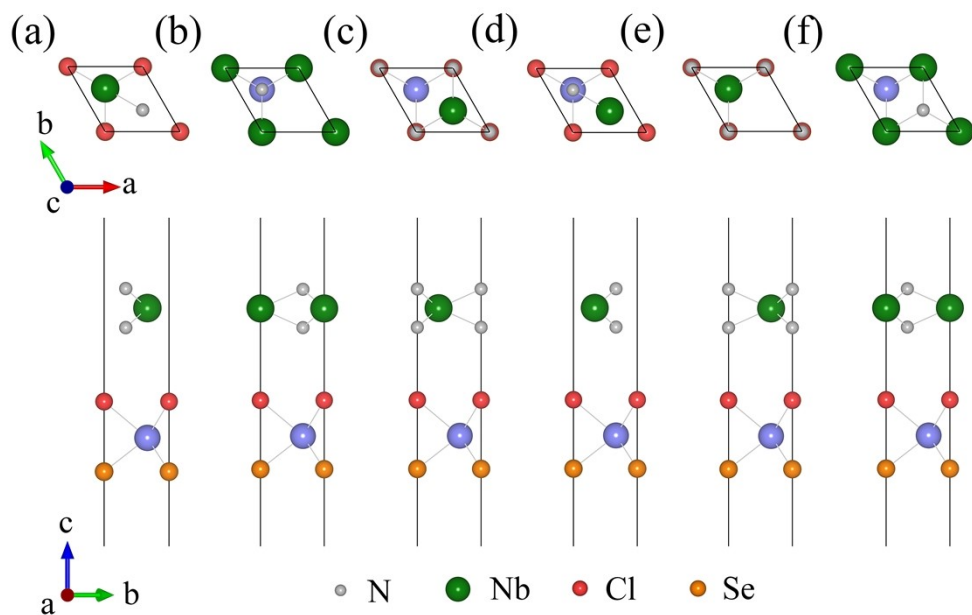

Fig. S2 (a) to (f) are top and side views of six NbSeCl/HfN<sub>2</sub> heterostructures. The blue, orange, red, green and gray balls represent Nb, Se, Cl, Hf and N atoms, respectively.

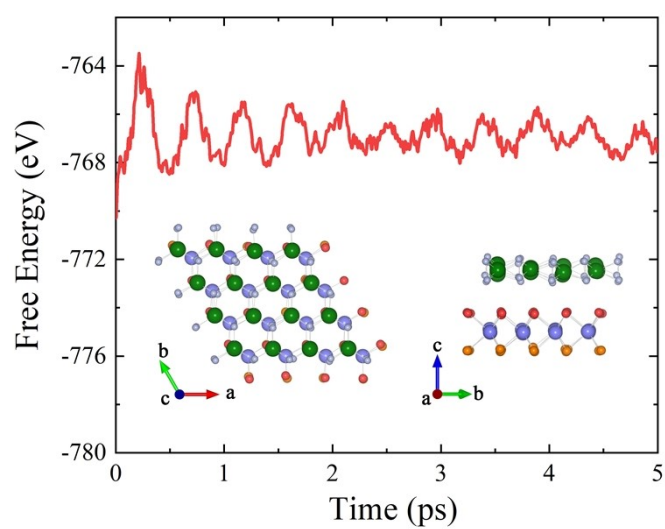

Fig. S3 Time evolution of free energy for NbSeCl/HfN<sub>2</sub> heterostructures at 300 K in AIMD simulation. The insets show the snapshot of atomic structure at 5 ps.

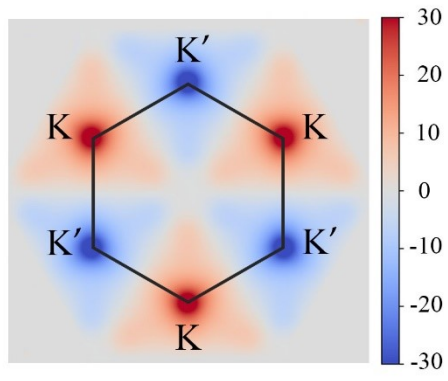

Fig. S4 Contour map of Berry curvature of NbSeCl/HfN<sub>2</sub> heterostructures over the entire 2D BZ.
